# Supplementary material
Source: PubMed Central journal article supplement (PMC7367751)

Full unedited gel for Figure 1B

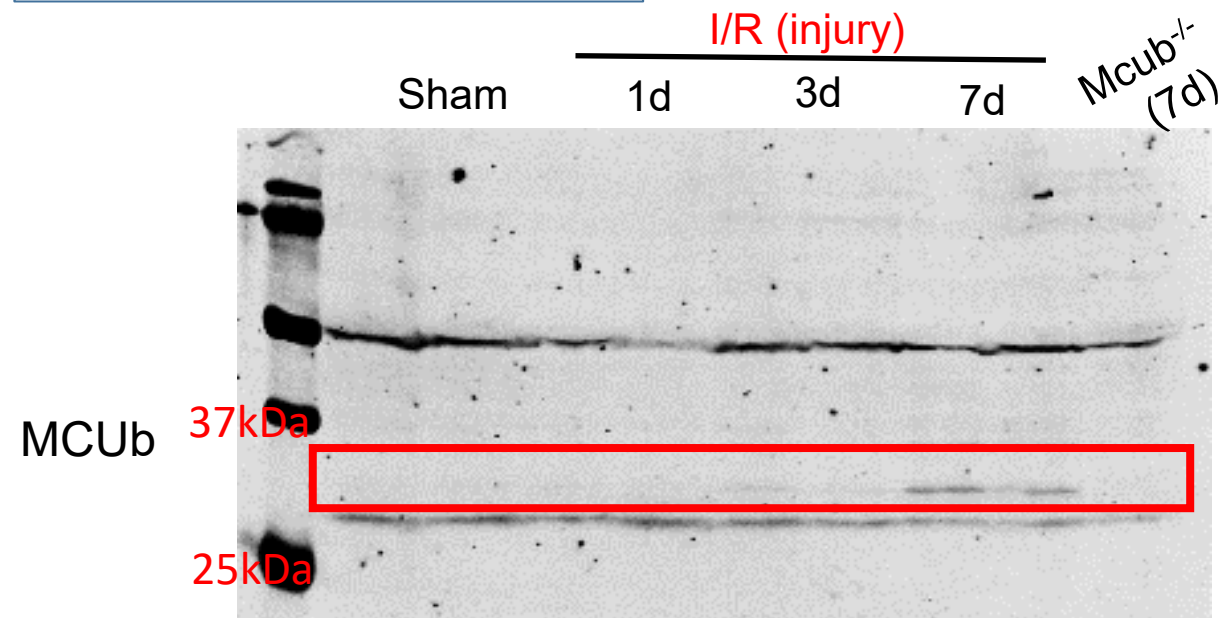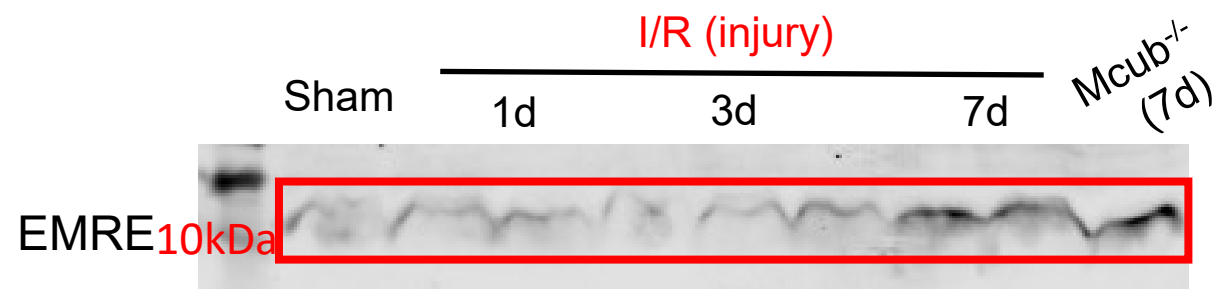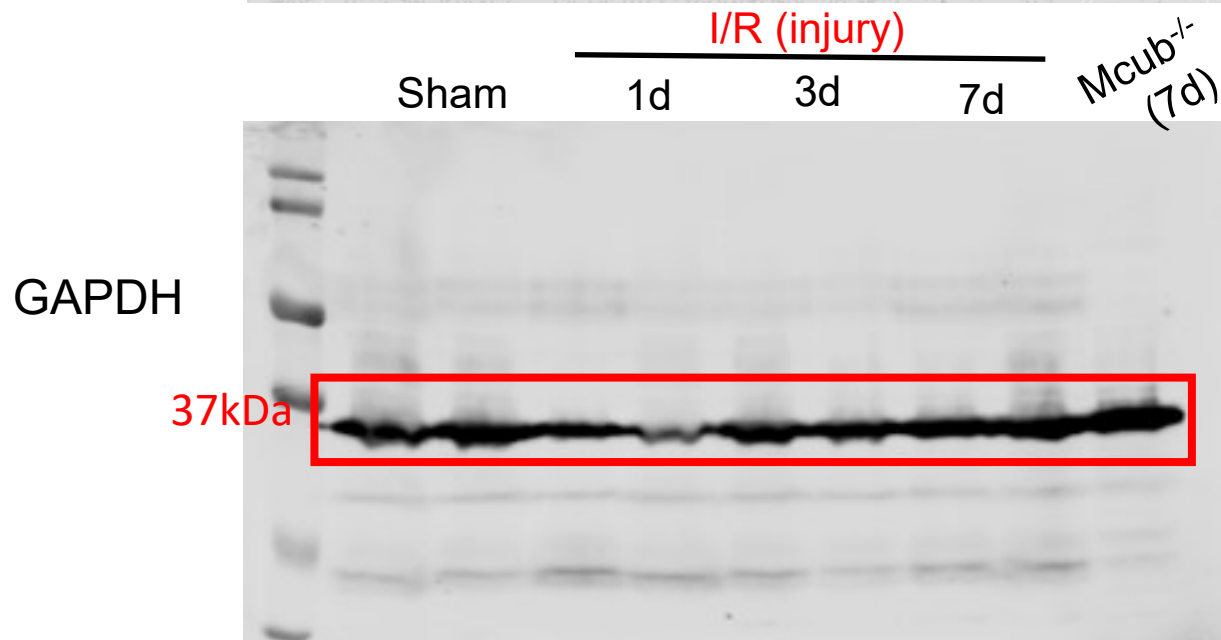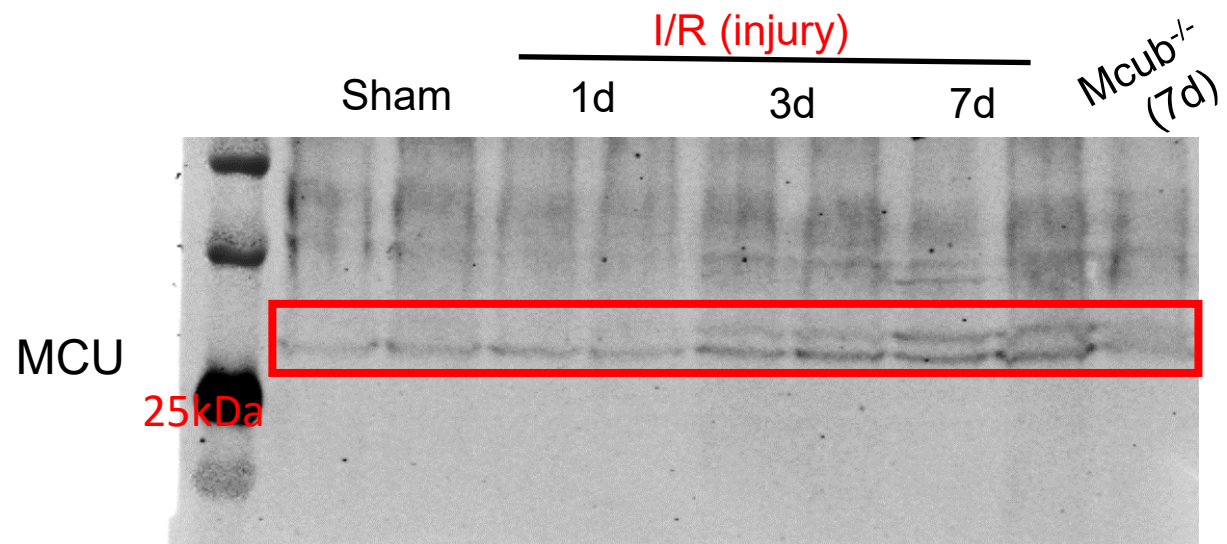

Full unedited gel for Figure 1C

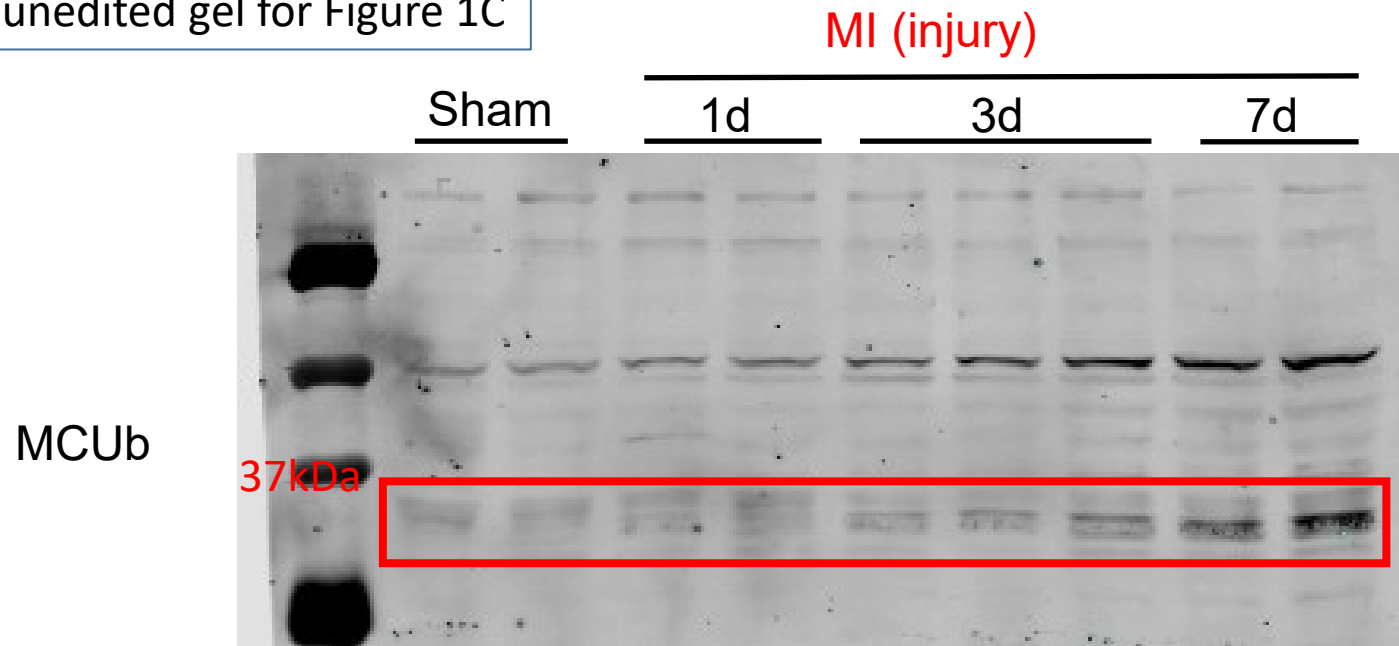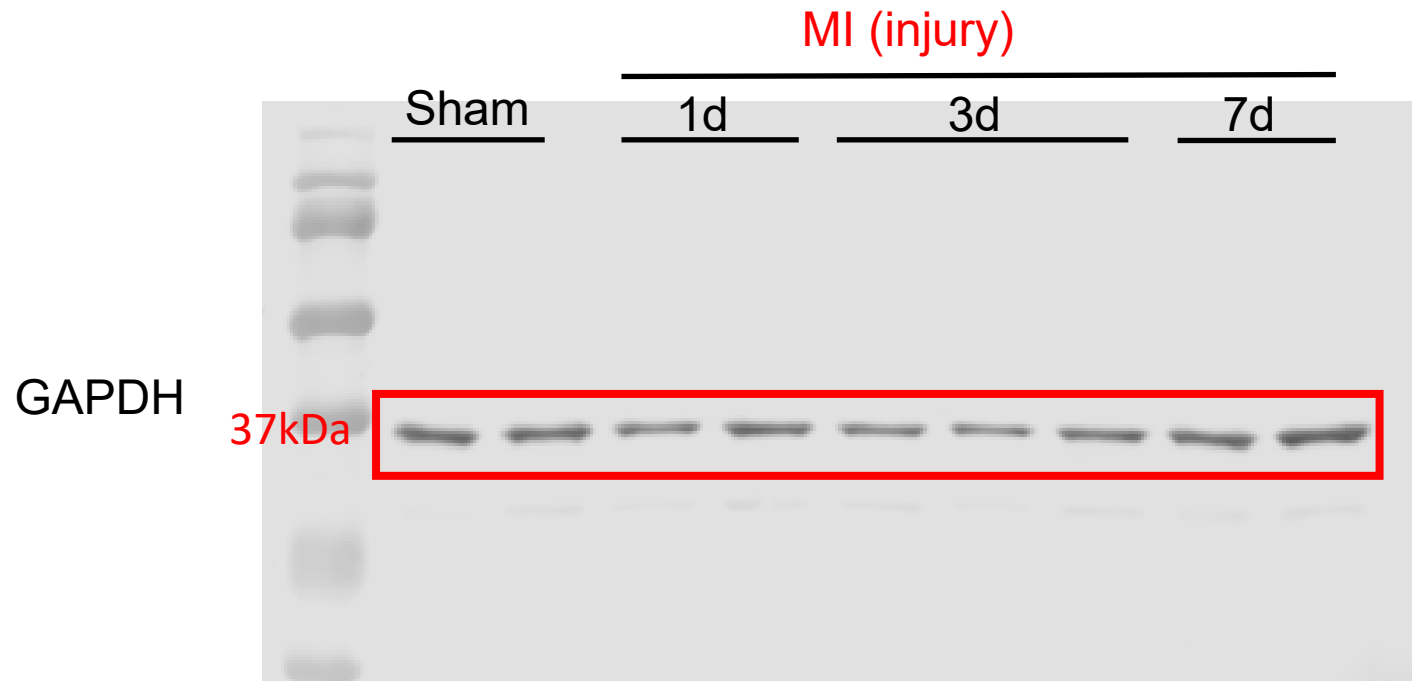

Full unedited gel for Figure 2B

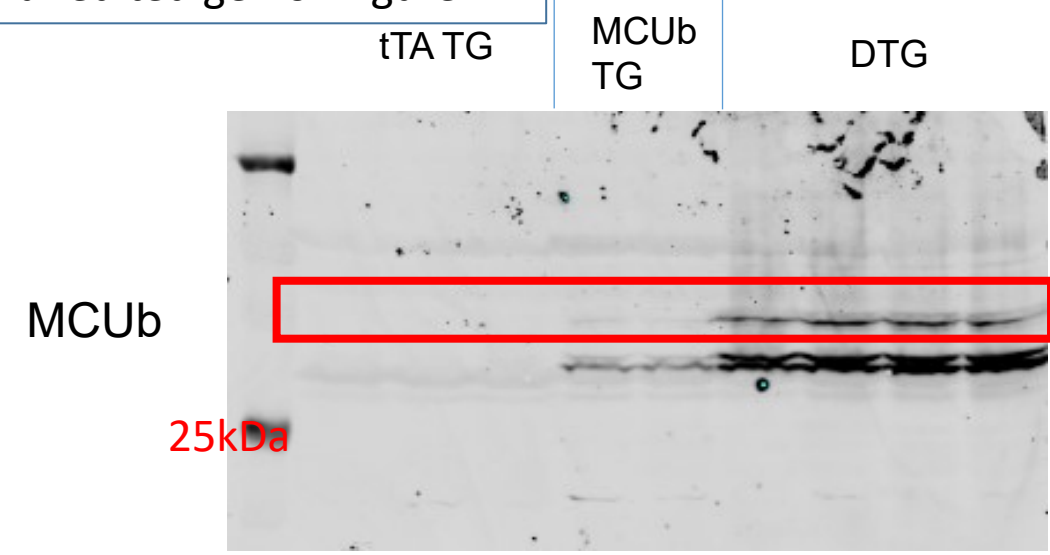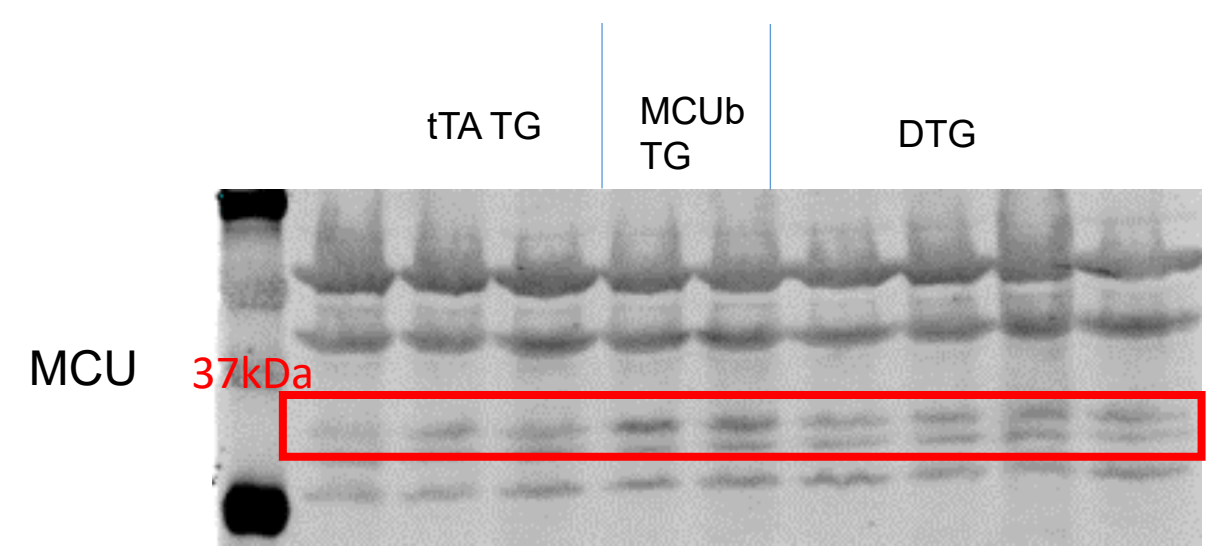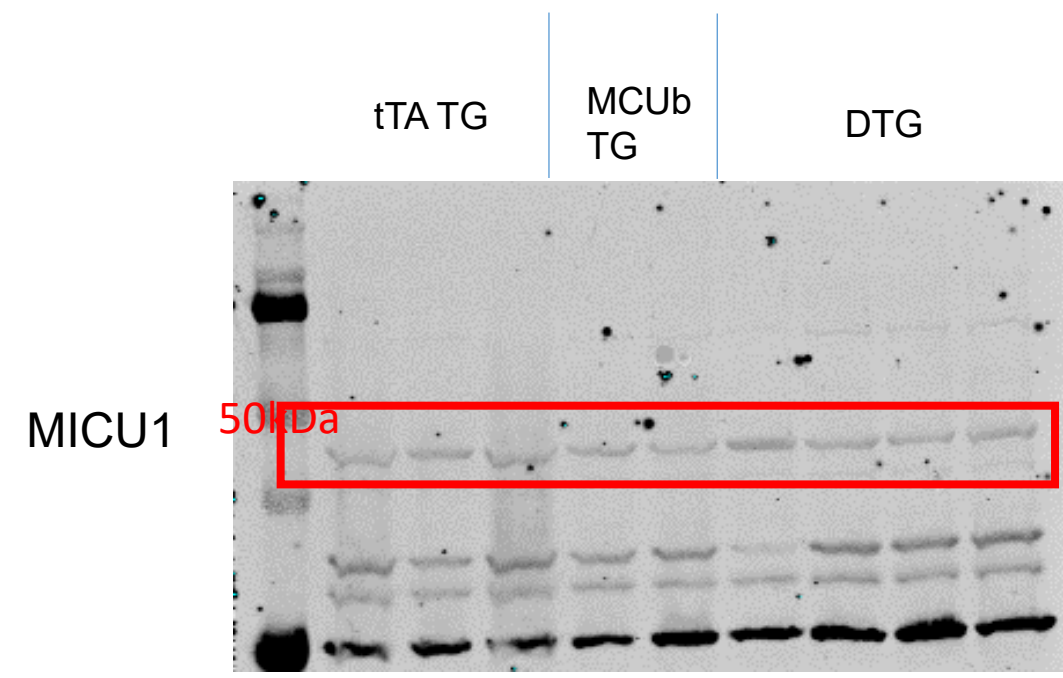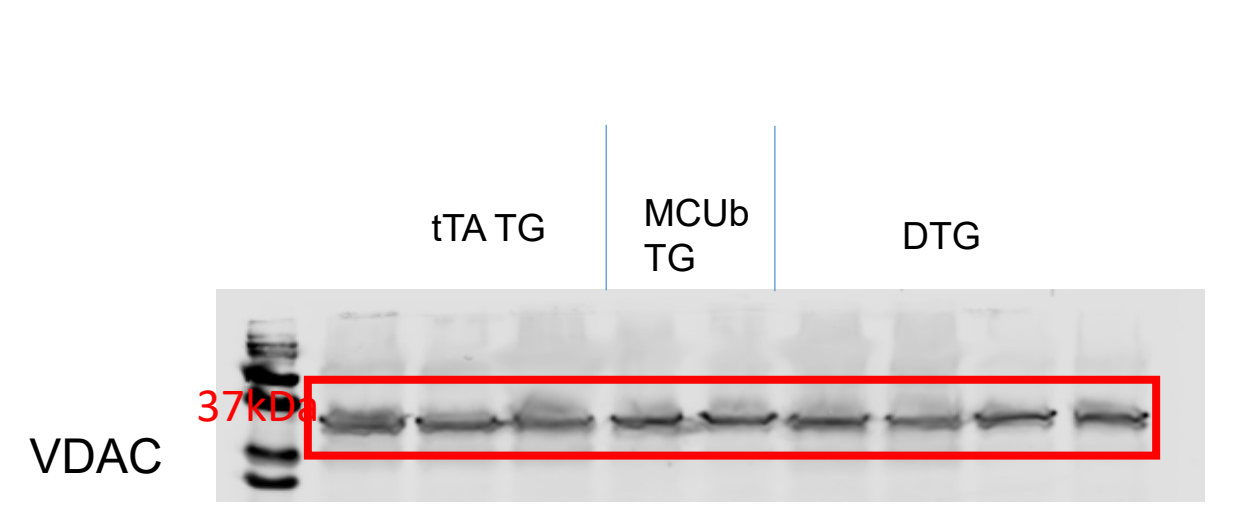

Full unedited gel for Figure 2B

tTA TG

MCUb TG

DTG

MICU2 50kDa

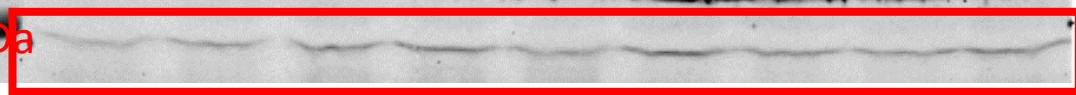

tTA TG

MCUb TG

DTG

EMRE 10kDa

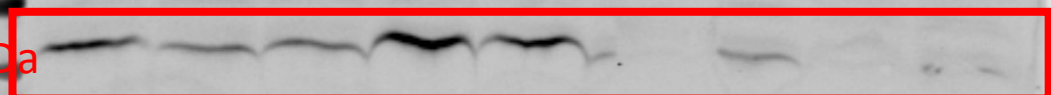

tTA TG

MCUb TG

DTG

NCLX 75kDa

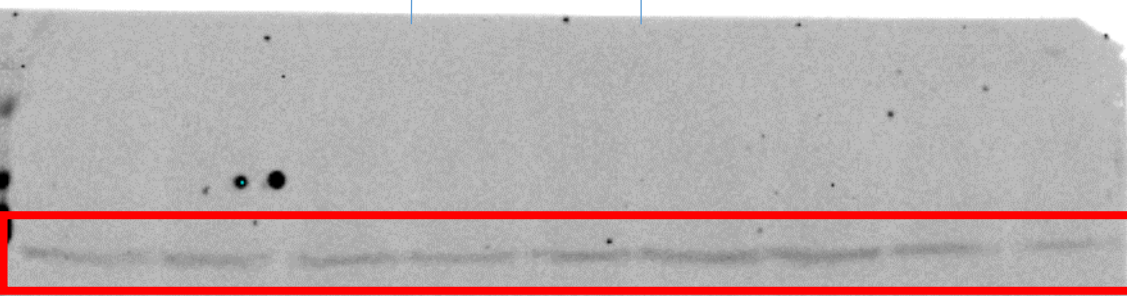

Full unedited gel for Figure 2C

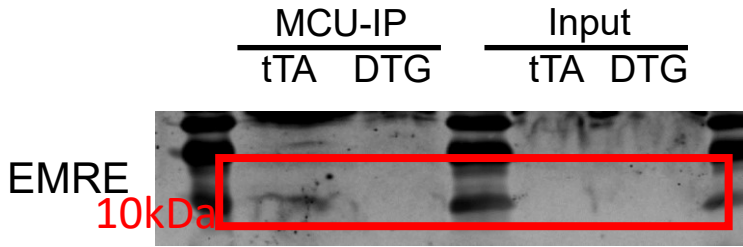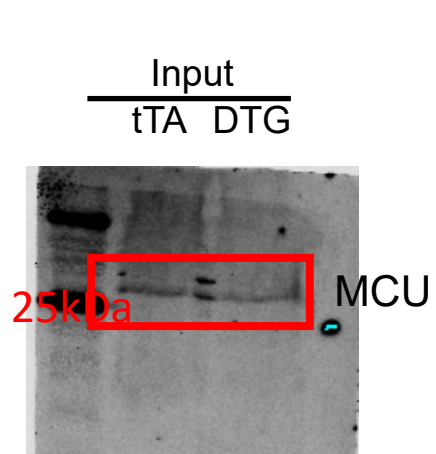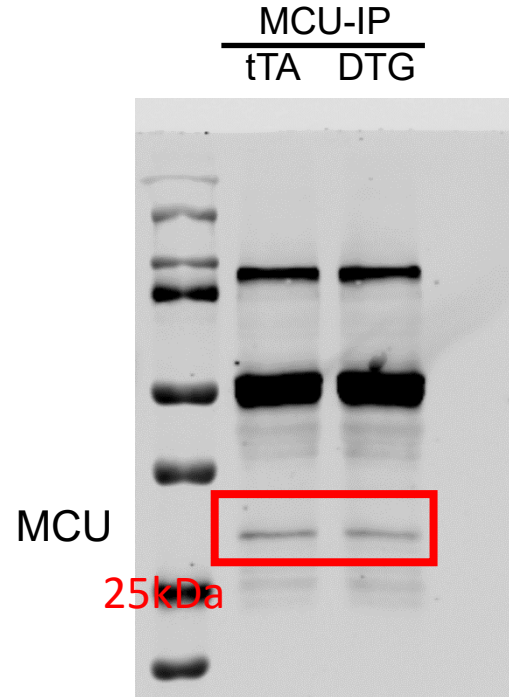

Full unedited gel for Figure 4B

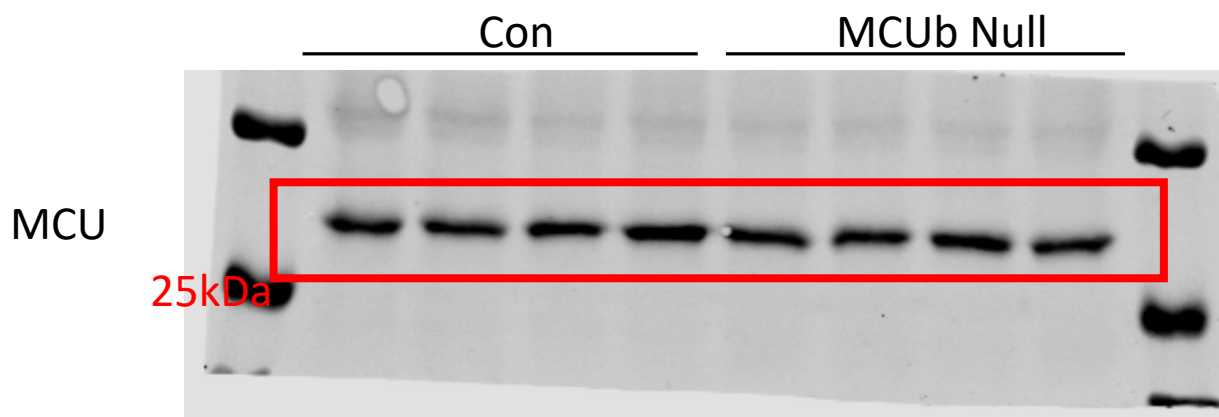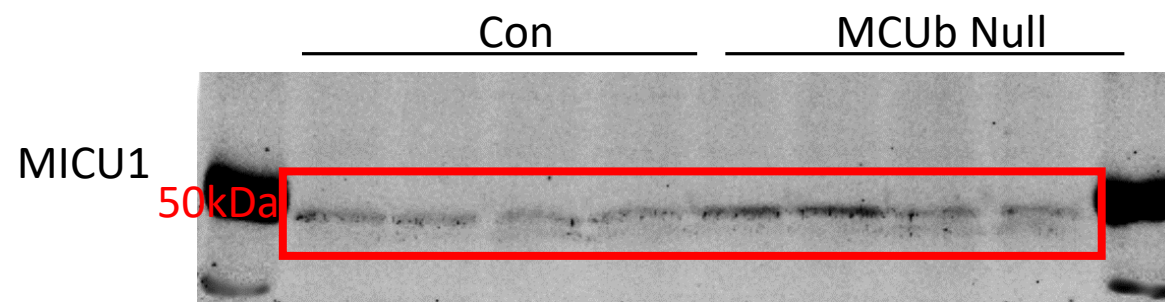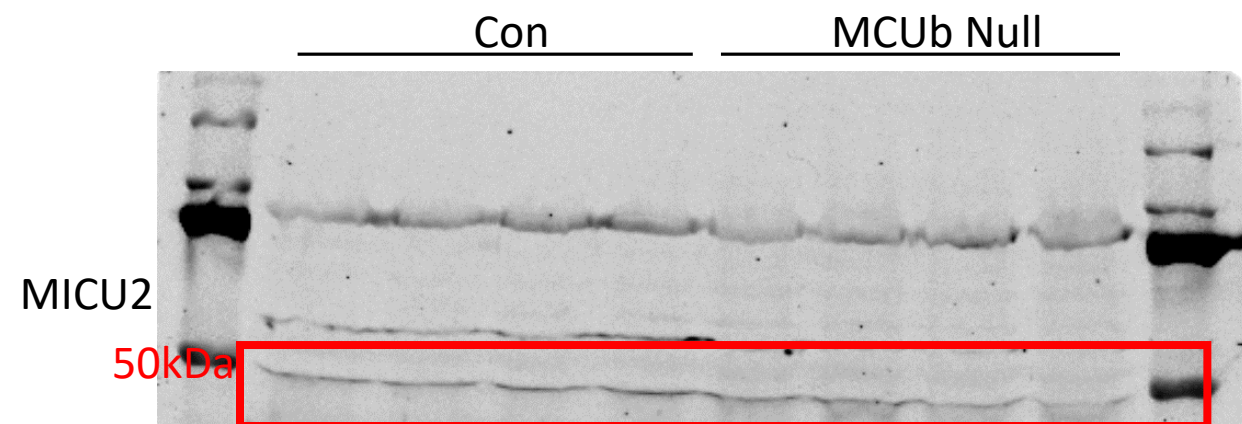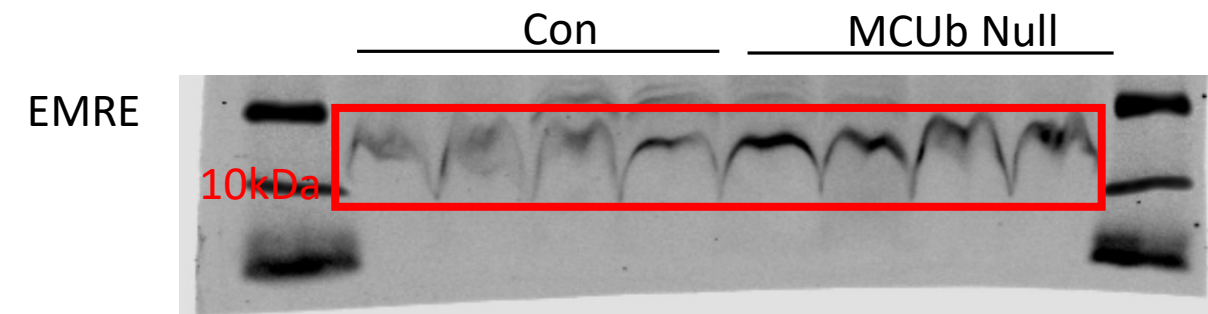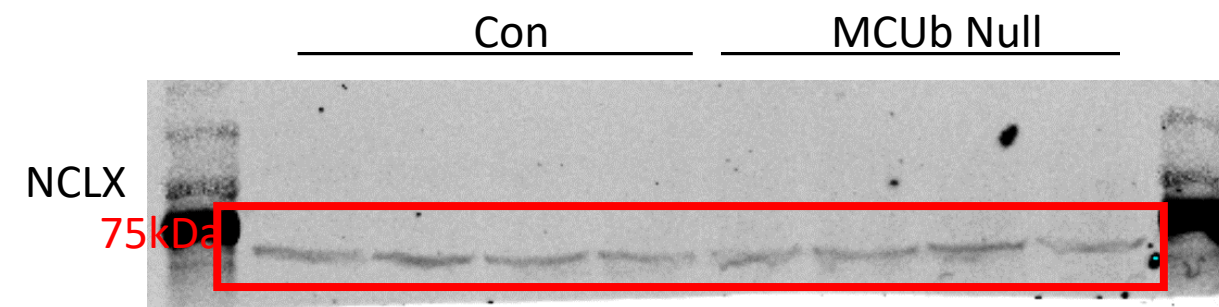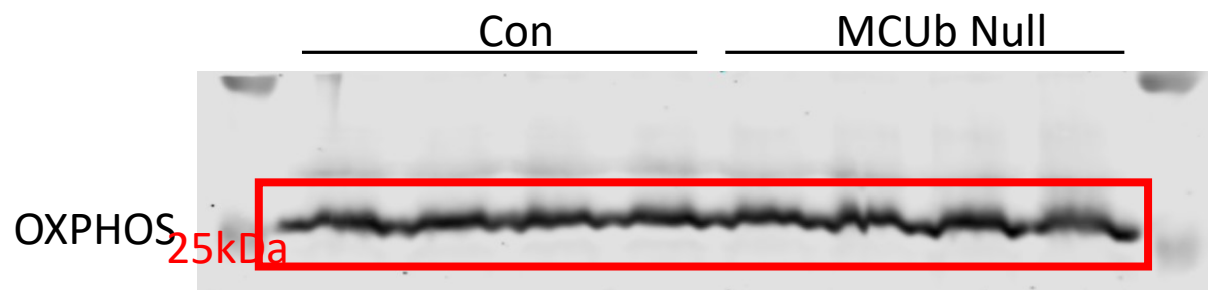

Full unedited gel for Figure 5K

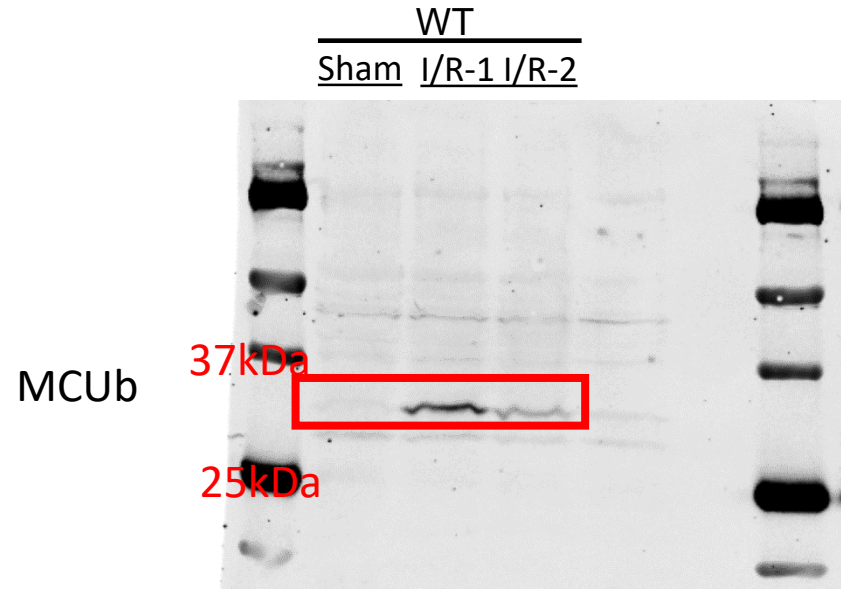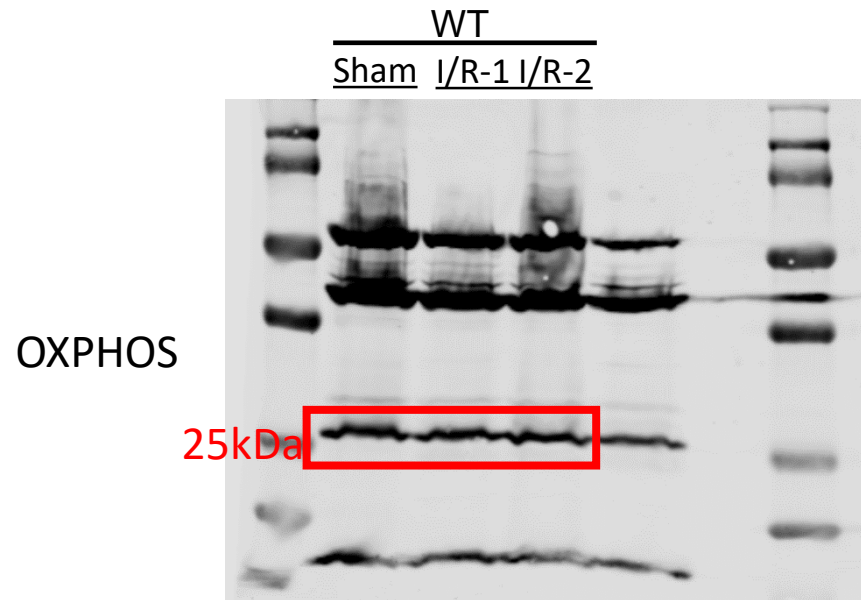

Full unedited gel for Figure 6C

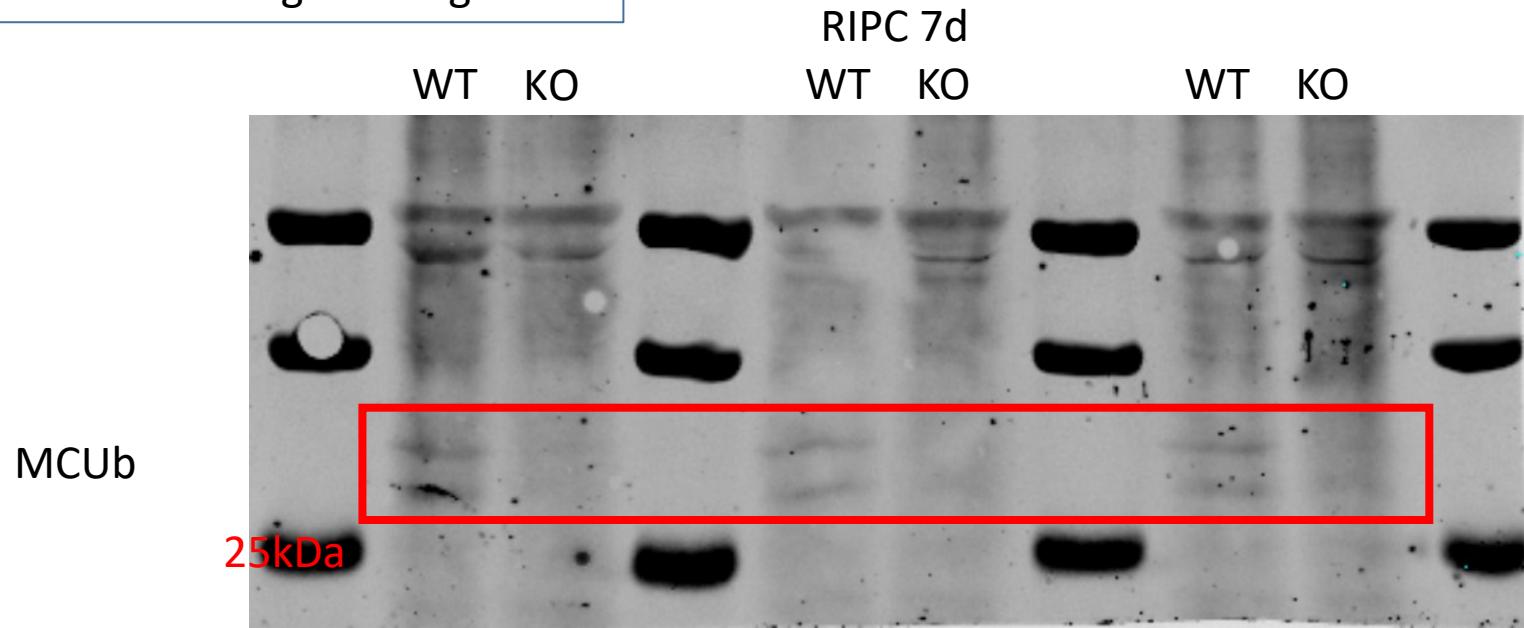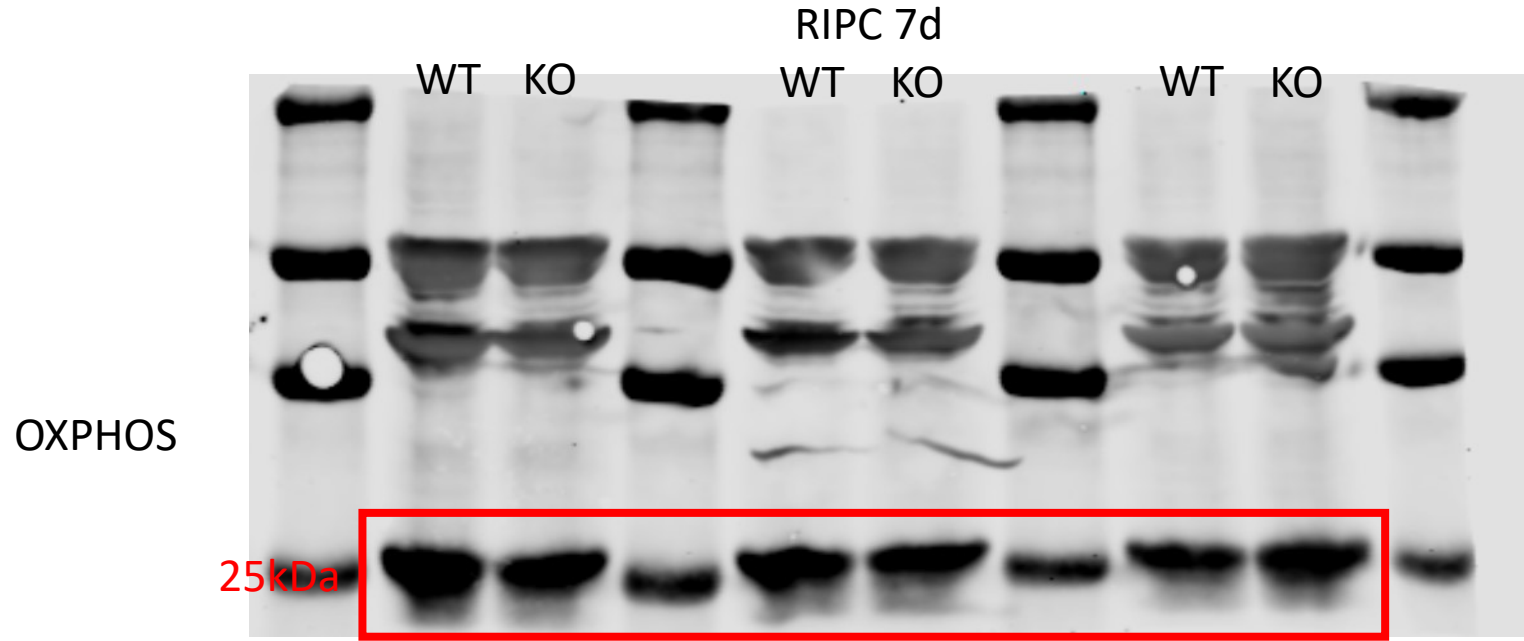



Full unedited gel for Online Figure V

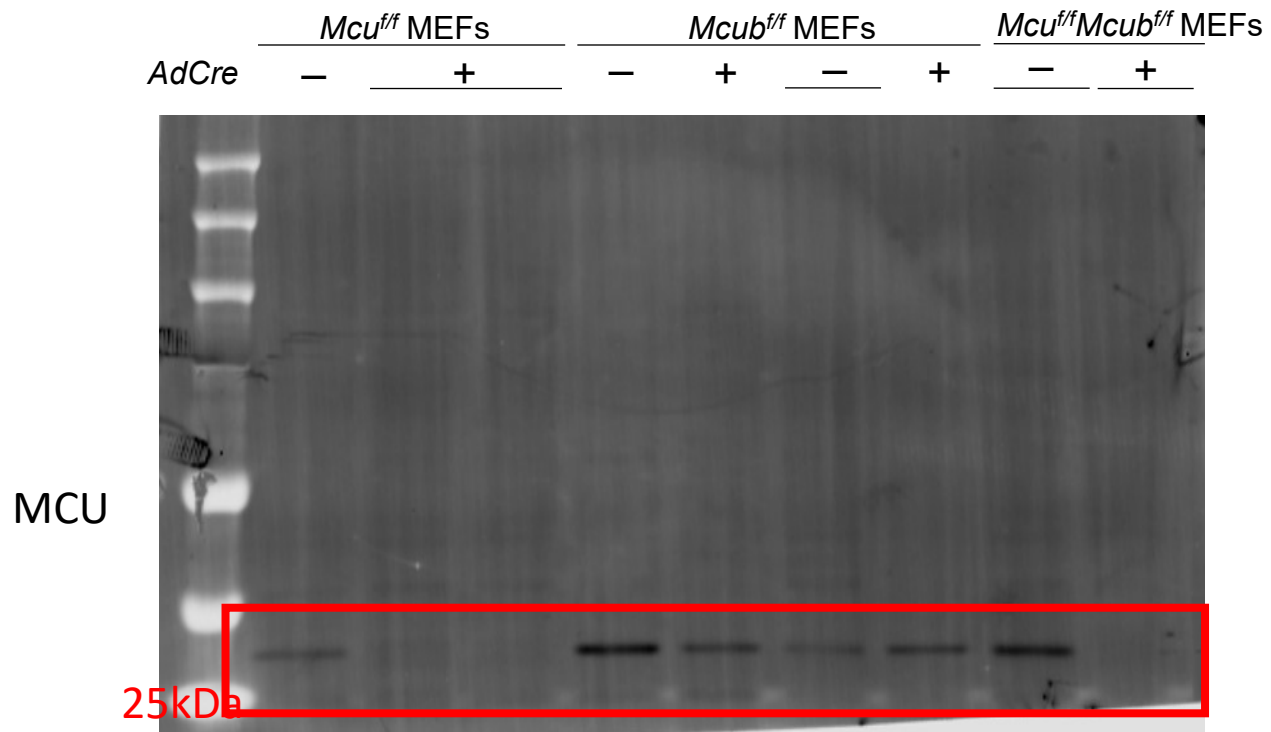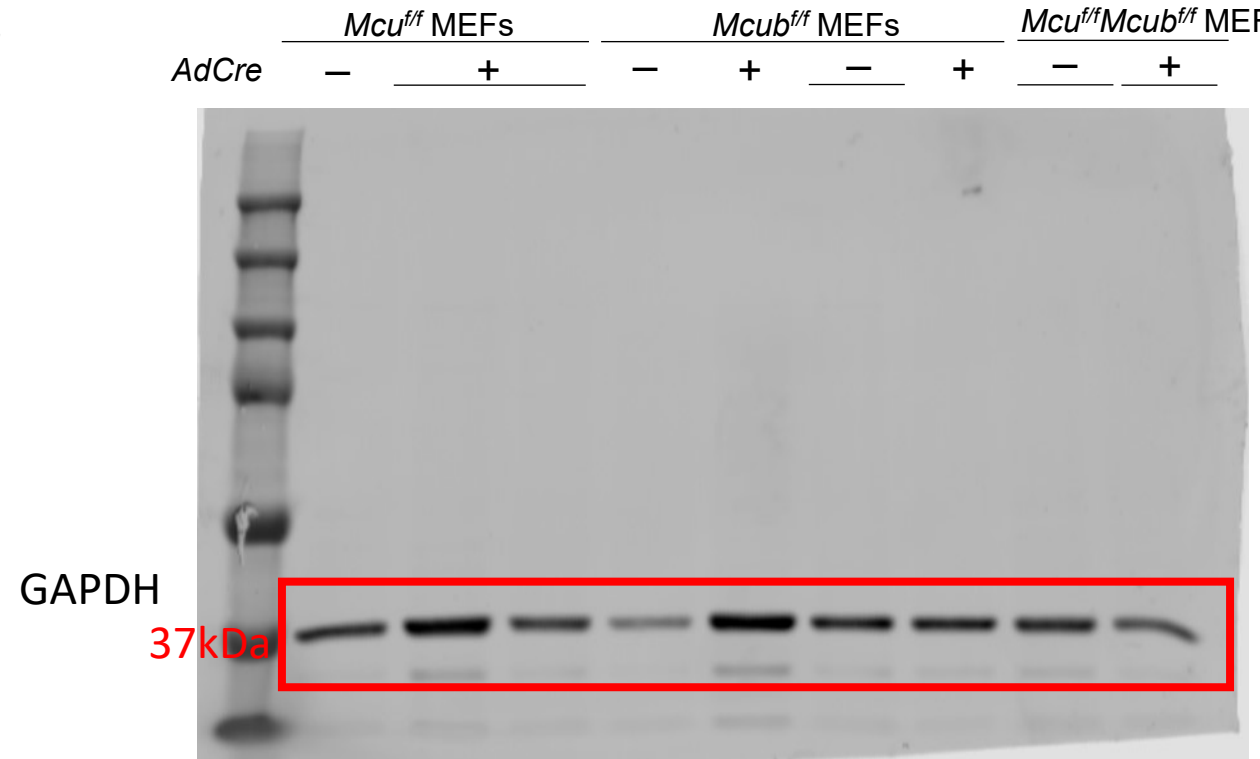

Full unedited gel for Online Figure V

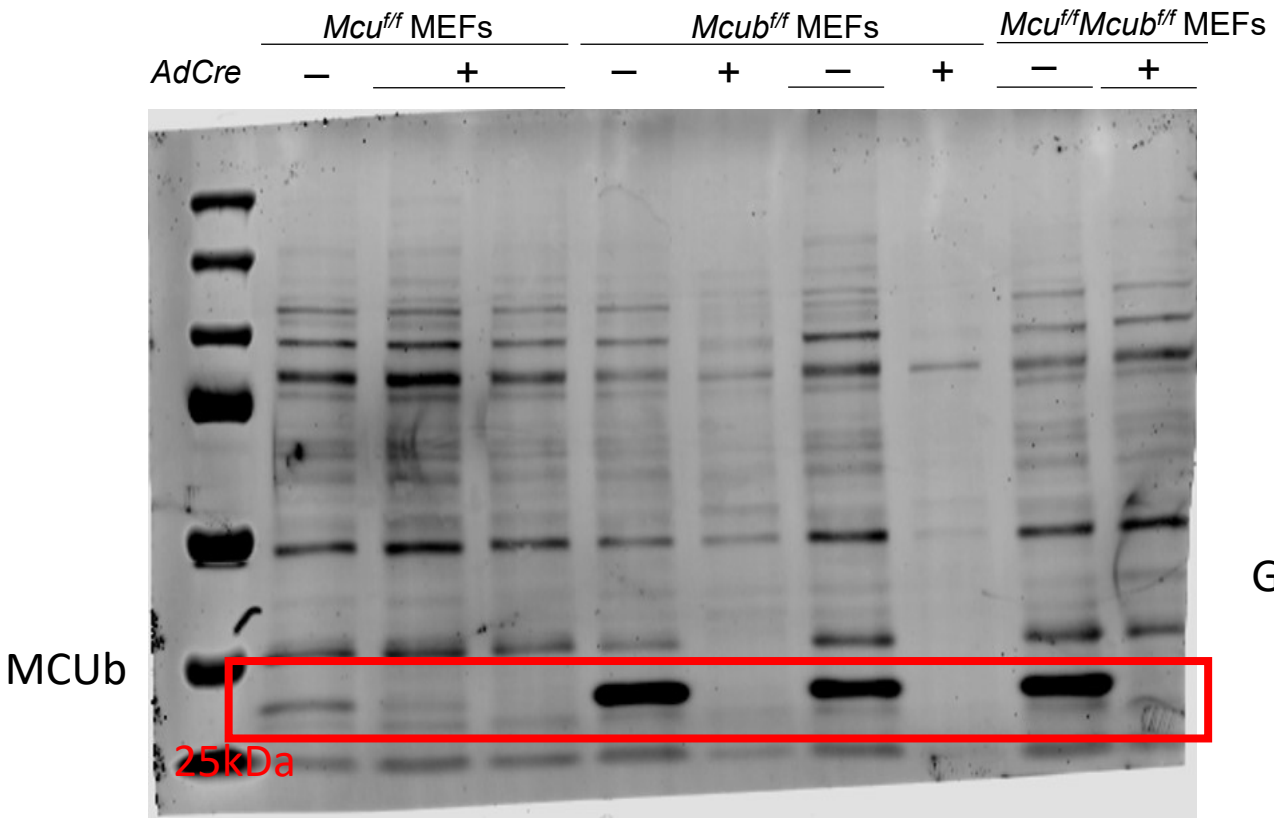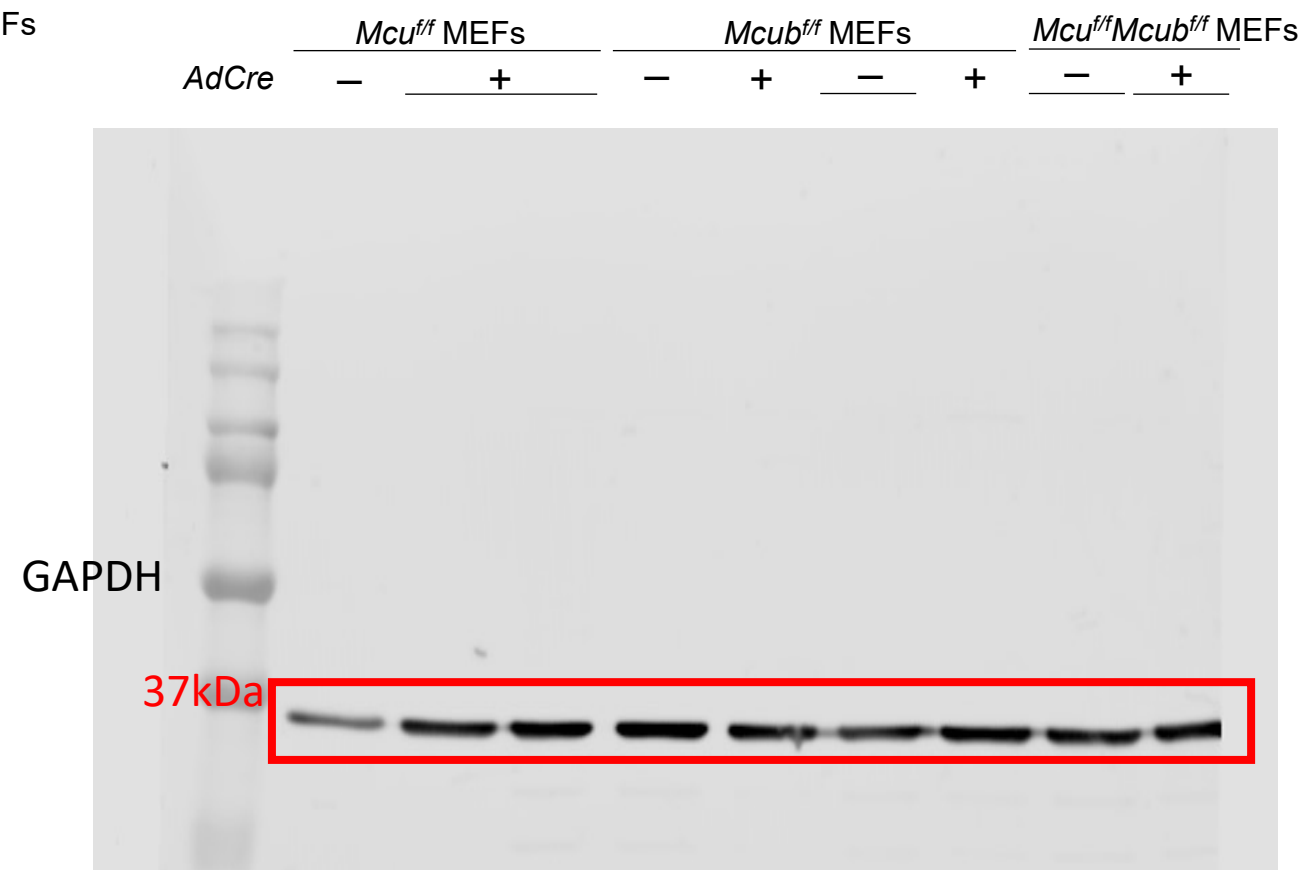

Supplement: NIHMS1585871-supplement-316369_Uncut_Gel_Blots.pdf [file NIHMS1585871-supplement-316369_Uncut_Gel_Blots.pdf]
