# Supplementary material
Source: PubMed Central journal article supplement (PMC7367751)
Supplement: NIHMS1585871-supplement-316369_Major_Resources_Table.pdf [file NIHMS1585871-supplement-316369_Major_Resources_Table.pdf]

## Major Resources Table

In order to allow validation and replication of experiments, all essential research materials listed in the Methods should be included in the Major Resources Table below. Authors are encouraged to use public repositories for protocols, data, code, and other materials and provide persistent identifiers and/or links to repositories when available. Authors may add or delete rows as needed.

### Animals (in vivo studies)

| Species                  | Vendor or Source                                      | Background Strain | Sex           | Persistent ID / URL                                                               |
|--------------------------|-------------------------------------------------------|-------------------|---------------|-----------------------------------------------------------------------------------|
| Wildtype mice            | Gene-targeting core at Cincinnati Children's Hospital | C57BL/6           | Male & Female |                                                                                   |
| $\alpha$ MHC-tTA mice    | Gene-targeting core at Cincinnati Children's Hospital | C57BL/6           | Male & Female |                                                                                   |
| $\alpha$ MHC-MCUB mice   | Gene-targeting core at Cincinnati Children's Hospital | C57BL/6           | Male & Female |                                                                                   |
| Mcub <sup>-/-</sup> mice | European Conditional Mouse Mutagenesis program        | C57BL/6           | Male & Female | MGI ID: 1914065                                                                   |
| FLPe mice                | The Jackson Laboratory                                | C57BL/6           | Male & Female | <a href="https://www.jax.org/strain/003946">https://www.jax.org/strain/003946</a> |

### Genetically Modified Animals

|                                                 | Species                    | Vendor or Source                                      | Background Strain | Other Information | Persistent ID / URL                                                               |
|-------------------------------------------------|----------------------------|-------------------------------------------------------|-------------------|-------------------|-----------------------------------------------------------------------------------|
| $\alpha$ MHC-MCUB tTA mice                      |                            |                                                       |                   |                   |                                                                                   |
| <b>Parent – Male</b>                            | $\alpha$ MHC-MCUB mice     | Gene-targeting core at Cincinnati Children's Hospital | C57BL/6           |                   |                                                                                   |
| <b>Parent – Female</b>                          | $\alpha$ MHC-tTA mice      | Gene-targeting core at Cincinnati Children's Hospital | C57BL/6           |                   |                                                                                   |
| Mcub <sup>fl/fl</sup> mice                      |                            |                                                       |                   |                   |                                                                                   |
| <b>Parent – Male</b>                            | Mcub <sup>-/-</sup> mice   | European Conditional Mouse Mutagenesis program        | C57BL/6           |                   | MGI ID: 1914065                                                                   |
| <b>Parent – Female</b>                          | FLPe mice                  | The Jackson Laboratory                                | C57BL/6           |                   | <a href="https://www.jax.org/strain/003946">https://www.jax.org/strain/003946</a> |
| Mcu <sup>fl/fl</sup> Mcub <sup>fl/fl</sup> mice |                            |                                                       |                   |                   |                                                                                   |
| <b>Parent – Male</b>                            | Mcub <sup>fl/fl</sup> mice |                                                       | C57BL/6           |                   |                                                                                   |
| <b>Parent – Female</b>                          | Mcu <sup>fl/fl</sup> mice  |                                                       | C57BL/6           |                   | Publication cited in paper                                                        |

DOI [to be added]

## Antibodies

| Target antigen                                       | Vendor or Source                   | Catalog #    | Working concentration | Lot # (preferred but not required) | Persistent ID / URL                                                                                                                                                                                                                                                                                                                                                                                   |
|------------------------------------------------------|------------------------------------|--------------|-----------------------|------------------------------------|-------------------------------------------------------------------------------------------------------------------------------------------------------------------------------------------------------------------------------------------------------------------------------------------------------------------------------------------------------------------------------------------------------|
| MCU                                                  | Cell Signaling                     | 14997        | 1:500                 |                                    | <a href="https://www.cellsignal.com/products/primary-antibodies/mcu-d2z3b-rabbit-mab/14997">https://www.cellsignal.com/products/primary-antibodies/mcu-d2z3b-rabbit-mab/14997</a>                                                                                                                                                                                                                     |
| MCUb                                                 | custom-made from YenZym Antibodies | N/A          | 1:250                 |                                    |                                                                                                                                                                                                                                                                                                                                                                                                       |
| MICU1                                                | Cell Signaling                     | 12524S       | 1:500                 |                                    | <a href="https://www.cellsignal.com/products/primary-antibodies/cbara1-micu1-d4p8q-rabbit-mab/12524?site-search-type=Products&amp;N=4294956287&amp;Ntt=12524s&amp;fromPage=plp&amp;_requestid=690731">https://www.cellsignal.com/products/primary-antibodies/cbara1-micu1-d4p8q-rabbit-mab/12524?site-search-type=Products&amp;N=4294956287&amp;Ntt=12524s&amp;fromPage=plp&amp;_requestid=690731</a> |
| MICU2                                                | Bethyl Laboratories                | A300-BL19212 | 1:500                 |                                    | No commercial link, obtained by contacting Bethyl Laboratories customer service representatives directly                                                                                                                                                                                                                                                                                              |
| EMRE                                                 | Bethyl Laboratories                | A300-BL19208 | 1:500                 |                                    | No commercial link, obtained by contacting Bethyl Laboratories customer service representatives directly                                                                                                                                                                                                                                                                                              |
| NCLX                                                 | Abcam                              | ab83551      | 1:500                 |                                    | <a href="https://www.abcam.com/slc24a6-antibody-ab83551.html">https://www.abcam.com/slc24a6-antibody-ab83551.html</a>                                                                                                                                                                                                                                                                                 |
| OXPHOS cocktail                                      | Abcam                              | ab110413     | 1:5000                |                                    | <a href="https://www.abcam.com/total-oxphos-rodent-wb-antibody-cocktail-ab110413.html">https://www.abcam.com/total-oxphos-rodent-wb-antibody-cocktail-ab110413.html</a>                                                                                                                                                                                                                               |
| VDAC                                                 | Abcam                              | ab14734      | 1:5000                |                                    | <a href="https://www.abcam.com/vdac1-porin-antibody-20b12af2-ab14734.html">https://www.abcam.com/vdac1-porin-antibody-20b12af2-ab14734.html</a>                                                                                                                                                                                                                                                       |
| GAPDH                                                | Fitzgerald                         | 10R-G109A    | 1:5000                |                                    | <a href="https://www.fitzgerald-fii.com/gapdh-antibody-10r-g109a.html">https://www.fitzgerald-fii.com/gapdh-antibody-10r-g109a.html</a>                                                                                                                                                                                                                                                               |
| IRDye® 800CW Goat anti-Rabbit IgG Secondary Antibody | LI-COR Biosciences                 | 926-32211    | 1:10,000              |                                    | <a href="https://www.licor.com/bio/reagents/irdye-800cw-goat-anti-rabbit-igg-secondary-antibody">https://www.licor.com/bio/reagents/irdye-800cw-goat-anti-rabbit-igg-secondary-antibody</a>                                                                                                                                                                                                           |
| IRDye® 680RD Goat anti-Mouse IgG Secondary Antibody  | LI-COR Biosciences                 | 925-68070    | 1:10,000              |                                    | <a href="https://www.licor.com/bio/reagents/irdye-680rd-goat-anti-mouse-igg-secondary-antibody">https://www.licor.com/bio/reagents/irdye-680rd-goat-anti-mouse-igg-secondary-antibody</a>                                                                                                                                                                                                             |

DNA/cDNA Clones

| Clone Name                                                         | Sequence                                                                                                                                                                                                                                                                                                                                                                                                                                                                                                                                                                                                                                                                                                                                                                                                                                                                                                                                                                                                                                                                                                                                                                                                                                                                                                                                                                                                                                                                                                                                                                                                                                                                                                                                                                                                                                                                                                                                                                                                                                                                                                                                                                                                                                                                                                                                                                                                                                                                                                                                                                                                                                                                                                                                                                                                                                                                                                                                                                                                                                                                                                                                                       | Source / Repository | Persistent ID / URL                                                                |
|--------------------------------------------------------------------|----------------------------------------------------------------------------------------------------------------------------------------------------------------------------------------------------------------------------------------------------------------------------------------------------------------------------------------------------------------------------------------------------------------------------------------------------------------------------------------------------------------------------------------------------------------------------------------------------------------------------------------------------------------------------------------------------------------------------------------------------------------------------------------------------------------------------------------------------------------------------------------------------------------------------------------------------------------------------------------------------------------------------------------------------------------------------------------------------------------------------------------------------------------------------------------------------------------------------------------------------------------------------------------------------------------------------------------------------------------------------------------------------------------------------------------------------------------------------------------------------------------------------------------------------------------------------------------------------------------------------------------------------------------------------------------------------------------------------------------------------------------------------------------------------------------------------------------------------------------------------------------------------------------------------------------------------------------------------------------------------------------------------------------------------------------------------------------------------------------------------------------------------------------------------------------------------------------------------------------------------------------------------------------------------------------------------------------------------------------------------------------------------------------------------------------------------------------------------------------------------------------------------------------------------------------------------------------------------------------------------------------------------------------------------------------------------------------------------------------------------------------------------------------------------------------------------------------------------------------------------------------------------------------------------------------------------------------------------------------------------------------------------------------------------------------------------------------------------------------------------------------------------------------|---------------------|------------------------------------------------------------------------------------|
| <p>pLenti<br/>CMV/TO<br/>SV40 small<br/>+ Large T<br/>(w612-1)</p> | <p>CGATAAGCTTGGGAGTTCGCGTTACATAACTTACGGTAAATGGCCCGCTGGCTGACCGCCCAACGACC<br/>           CCCGCCATTGACGTCAATAATGACGTATGTTCCCATAGTAACGCCAATAGGGACTTTCATTGACGTCA<br/>           ATGGGTGGAGTATTTACGGTAAACTGCCACTTGGCAGTACATCAAGTGTATCATATGCCAAGTACGCCC<br/>           CCTATTGACGTCAATGACGGTAAATGGCCCGCTGGCATTATGCCCAGTACATGACCTTATGGGACTTTC<br/>           CTACTTGGCAGTACATCTACGTATTAGTCATCGCTATTACCATGGTGATGCGGTTTTGGCAGTACATCAA<br/>           TGGGCGTGGATAGCGGTTTACTCACGGGATTTCAGTCTCCACCCATTGACGTCAATGGGAGTTTG<br/>           TTTTGGCACAAAATCAACGGGACTTTCAAAATGTCGTAACAACTCCGCCCATGACGCAAATGGGCG<br/>           GTAGGCGTGTACGGTGGGAGGTCTATATAAGCAGAGCTCTCCCTATCAGTGATAGAGATCTCCCTATCAG<br/>           TGATAGAGATCGTCGACTAGTCCAGTGTGGTGGAAATTCTGCAGATATCAACAAGTTTGTACAAAAAAGCA<br/>           GGCTTTAAAGGAACCAATTCAGTCGACTGGATCCGCGGCCTCTGAGCTATTCCAGAAGTAGTGAGGAGGC<br/>           TTTTTGGAGGCCTAGGCTTTTCAAAAAGCTTTGCAAGATGGATAAAGTTTTAAACAGAGAGGAATCT<br/>           TTGCAGCTAATGGACCTTCTAGGTCTTGAAGGAGTGCCTGGGGGAATATTCCTCTGATGAGAAAGGCAT<br/>           ATTTAAAAAATGCAAGGAGTTTCATCCTGATAAAGGAGGAGATGAAGAAAAAATGAAGAAAATGAATAC<br/>           TCTGTACAAGAAAATGGAAGATGGAGTAAAATATGCTCATCAACCTGACTTTGGAGGCTTCTGGGATGCA<br/>           ACTGAGGTATTTGCTTCTTAAATCCTGGTGTGATGCAATGACTGCAACAATGGCCTGAGTGTG<br/>           CAAAGAAAATGCTGCTAACTGCATATGCTTGTGTGCTTACTGAGGATGAAGCATGAAAATAGAAAATT<br/>           ATACAGGAAAGATCCACTTGTGTGGGTTGATTGCTACTGCTTCGATTGCTTTAGAATGTGGTTTGGACTT<br/>           GATCTTTGTGAAGGAACCTTACTTCTGTGGTGTGACATAATTGGACAACTACCTACAGAGATTTAAAGC<br/>           TCTAAGGTAAATATAAAATTTTTAAGTGTATAATGTGTTAACTACTGATTCTAATTGTTTGTGATTTT<br/>           AGATTCACCTATGGAAGTATGAATGGGAGCAGTGGTGGAAATGCCTTAAATGAGGAAAACCTGTTTTG<br/>           CTCAGAAGAAAATGCCATCTAGTGATGATGAGGCTACTGCTGACTCTCAACATTCTACTCTCCAAAAAAG<br/>           AAGAGAAAGGTAGAAGACCCCAAGGACTTTCCTTCAGAATTGCTAAGTTTTTTGAGTCATGCTGTGTTTA<br/>           GTAATAGAACTCTTGCTTGCTTTGCTATTTACACCACAAAGGAAAAAGCTGCACTGCTATACAAGAAAAT<br/>           TATGGAAAAATATTCTGTAACCTTTATAAGTAGGCATAACAGTTATAATCATAACATACTGTTTTTCTT<br/>           ACTCCACACAGGCATAGAGTGTCTGCTATTAATAACTATGCTCAAAAATTGTGTACCTTTAGCTTTTTAA<br/>           TTTGTAAGGGGTTAATAAGGAATATTTGATGTATAGTGCCTTACTAGAGATCCATTTTCTGTTATTGA<br/>           GGAAAGTTTGCCAGGTGGGTTAAAGGAGCATGATTTAATCCAGAAGAAGCAGAGGAAACTAAACAAGTG<br/>           TCCTGGAAGCTTGTAACAGAGTATGCAATGGAAACAAAATGTGATGATGTGTTGTTATTGCTGGGATGT<br/>           ACTTGAATTTTCAAGTACAGTTTTGAAATGTGTTTAAATGATTAATAAAGAACAGCCAGCCACTATAA<br/>           GTACCATGAAAAGCATTATGCAAATGCTGCTATATTTGCTGACAGCAAAAACCAAAAAACCATATGCCAA<br/>           CAGGCTGTTGATACTGTTTTAGCTAAAAAGCGGTTGATAGCCTACAATTAAGAGAACAAAATGTTAA<br/>           CAAACAGATTTAATGATCTTTTGGATAGGATGGATATAATGTTTGGTTCTACAGGCTCTGCTGACATAGA<br/>           AGAATGGATGGCTGGAGTTGCTTGGCTACACTGTTTGTGCCCCAAAATGGATTAGTGGTGTATGACTTT<br/>           TAAAATGCATGGTGTACAACATTCCTAAAAAAGATACTGGCTGTTTAAAGGACCAATTGATAGTGGTA<br/>           AAATACTAGCAGCTGCTTTGCTTGAATTATGTGGGGGAAAGCTTTAAATGTTAATTTGCCCTTGGGA<br/>           CAGGCTGAACCTTTGAGCTAGGAGTAGCTATTGACCAGTTTTTGTAGTTTTTGGAGGATGTAAGGGCACT</p> | <p>Addgene</p>      | <p><a href="https://www.addgene.org/22298/">https://www.addgene.org/22298/</a></p> |

GGAGGGGAGTCCAGAGATTTGCCTTCAGGTCAGGGAATTAATAACCTGGACAATTTAAGGGATTATTTGG  
ATGGCAGTGTTAAGGTAACTTAGAAAAGAAACACCTAAATAAAAGAACTCAAATATTTCCCTGGAAT  
AGTCAACCATGAATGAGTACAGTGTGCCTAAAACACTGCAGGCCAGATTTGTAACAAATAGATTTTAGG  
CCCAAAGATTATTTAAAGCATTGCCTGGAACGCAGTGAGTTTTGTTAGAAAAGAGAATAATCAAAGTG  
GCATTGCTTTGCTTCTTATGTTAATTTGGTACAGACCTGTGGCTGAGTTTGCTCAAAGTATTCAGAGCAG  
AATTGTGGAGTGGAAAGAGAGATTGGACAAAGAGTTTAGTTTGTGAGTATCAAAAAATGAAGTTAAT  
GTGGCTATGGGAATTGGAGTTTTAGATTGGCTAAGAAACAGTGTATGATGATGAAGACAGCCAGGAAA  
ATGCTGATAAAAAATGAAGATGGTGGGGAGAAGAACATGGAAGACTCAGGGCATGAAACAGGCATTGATTC  
ACAGTCCAAGGCTCATTTAGGCCCTCAGTCTCACAGTCTGTTTATGATCATAATCAGCCATACCAC  
ATTTGTAGAGGTTTTACTTGCTTTAAAAAACCTCCACACCTCCCTGAACCTGAAACATAAAATGAAT  
GCAATTGTTGTTGGATCCGGTACCGAATTCGCGGCCGACTCGAGATATCTAGACCCAGCTTTCTTG  
TACAAAGTGGTTGATATCCAGCACAGTGGCGGCCGCTCGACAATCAACCTCTGGATTACAAAATTTGTGA  
AAGATTGACTGGTATTCTTAACATGTTGCTCCTTTACGCTATGTGGATACGCTGCTTTAATGCCTTG  
TATCATGCTATTGCTCCCGTATGGCTTCATTTCTCCTCTGTATAAATCCTGGTTGCTGTCTTT  
ATGAGGAGTTGTGGCCGTTGTCAGGCAACGTGGCGTGGTGTGCACTGTGTTTGTGACGCAACCCCCAC  
TGGTTGGGGCATTGCCACCACCTGTCAGTCTTTCCGGGACTTCGCTTTCCCTCCCTATTGCCACG  
GCGGAACATCGCCGCTGCCTTGCCGCTGCTGGACAGGGGCTCGGCTGTTGGGCACTGACAATCCG  
TGGTGTGTCGGGGAAGCTGACGTCCTTTCCATGGCTGCTCGCTGTGTTGCCACCTGGATTCTGCGCGG  
GACGTCCTTCTGCTACGTCCTTCGCCCCTCAATCCAGCGGACCTTCCTCCCGCGGCTGCTGCCGGCT  
CTGCGGCCTCTCCGCTCTTCGCTTCGCCCTCAGACGAGTCGGATCTCCCTTTGGCGCCTCCCGC  
CTGGAATTCGAGCTCGGTACCTTTAAGACCAATGACTTACAAGGCAGCTGTAGATCTTAGCCACTTTTA  
AAAGAAAAGGGGGGACTGGAAGGGCTAGCTCACTCCCAACGAAGACAAGATCTGCTTTTGTGTTACTG  
GGTCTCTGGTTAGACCAGATCTGAGCCTGGGAGCTCTGCTGTAAGGGAACCCACTGCTTAAGCC  
TCAATAAAGCTTGCTTGAGTGCTTCAAGTAGTGTGTGCCGCTGTTGTGTGACTCTGGTAACTAGAGA  
TCCCTCAGACCCTTTAGTCAGTGTGAAAATCTCTAGCAGTAGTAGTTCATGTCATCTTATTATTCAGT  
ATTTATAACTTGCAAAGAAATGAATATCAGAGAGTGAGAGGAACCTGTTTATTGCAGCTTATAATGGTTA  
CAAATAAAGCAATAGCATCACAATTTACAAAATAAAGCATTTTTTTCACTGCATTCTAGTTGTGGTTG  
TCCAACTCATCAATGTATCTTATCATGTCTGGCTCTAGCTATCCCGCCCTAACTCCGCCAGTTCCGC  
CCATTCTCCGCCCCATGGCTGACTAATTTTTTTATTTATGCAGAGGCCGAGGCCGCTCGGCCTCTGAG  
CTATTCCAGAAGTAGTGAGGAGGCTTTTTGGAGGCCTAGGGACGTACCAATTCGCCCTATAGTGAGTC  
GTATTACGCGCCTCACTGGCCGTCGTTTTACAACGTCGTGACTGGGAAAACCTGGCGTTACCCAATT  
AATCGCCTTGACGACATCCCCCTTCGCCAGCTGGCGTAATAGCGAAGAGGCCCGCACCGATCGCCCT  
CCCAACAGTTGCGCAGCCTGAATGGCGAATGGGACGCGCCCTGTAGCGGCGCATTAAAGCGGCGGGTGT  
GGTGGTTACGCGCAGCGTGACCGCTACACTTGCCAGCGCCCTAGCGCCGCTCCTTTGCTTTCTCCCT  
TCCTTTCTCGCCACGTTCCGCCGCTTTCCCGTCAAGCTCTAAATCGGGGGCTCCCTTAGGGTTCCGAT  
TTAGTGCTTTACGGCACCTCGACCCAAAAAATTGATTAGGGTGATGGTTCACGTAGTGGGCCATCGCC  
CTGATAGACGGTTTTTCGCCCTTGACGTTGGAGTCCACGTTCTTTAATAGTGGACTCTTGTCCAACT  
GGAACAACACTCAACCTATCTCGGTCTATTCTTTGATTTATAAGGGATTTTGCCGATTTCCGCCTATT  
GGTAAAAAATGAGCTGATTTAACAAAAATTAACGCGAATTTTAACAAAATATTAACGCTTACAATTT

AGGTGGCACTTTTCGGGGAAATGTGCGCGGAACCCCTATTTGTTTATTTTTCTAAATACATTCAAATATG  
TATCCGCTCATGAGACAATAACCCTGATAAATGCTTCAATAATATTGAAAAAGGAAGAGTATGAGTATTC  
AACATTTCCGTGTCGCCCTTATCCCTTTTTGCGGCATTTGCTTCTGTTTTGCTCACCCAGAAAC  
GCTGGTGAAAGTAAAAGATGCTGAAGATCAGTTGGGTGCACGAGTGGTTACATCGAACTGGATCTCAAC  
AGCGGTAAAGATCCTTGAGAGTTTTCGCCCCGAAGAACGTTTTCCAATGATGAGCACTTTTAAAGTTCTGC  
TATGTGGCGCGGTATTATCCCGTATTGACGCCGGGAAGAGCAACTCGGTGCGCCGATACACTATTCTCA  
GAATGACTTGGTTGAGTACTACCAGTACAGAAAAGCATCTTACGGATGGCATGACAGTAAGAGAATTA  
TGCAGTGCTGCCATAACCATGAGTGATAAACTGCGGCCAACTTACTTCTGACAACGATCGGAGGACCGA  
AGGAGCTAACCGCTTTTTGCACAACATGGGGGATCATGTAACCTGCTTATGATCGTTGGGAACCGGAGCT  
GAATGAAGCCATACCAAACGACGAGCGTGACACCACGATGCCTGTAGCAATGGCAACAACGTTGCGCAA  
CTATTAAGTGGCGAACTACTTACTCTAGCTTCCCGGCAACAATTAATAGACTGGATGGAGGCGGATAAAG  
TTGCAGGACCACTTCTGCGCTCGGCCCTCCGGCTGGCTGTTTATTGCTGATAAATCTGGAGCCGGTGA  
GCGTGGGTCTCGCGGTATCATTGCAGCACTGGGGCCAGATGGTAAGCCCTCCCGTATCGTAGTTATCTAC  
ACGACGGGGAGTCAGGCAACTATGGATGAACGAAATAGACAGATCGCTGAGATAGGTGCCTCACTGATTA  
AGCATTGGTAACTGTCAGACCAAGTTACTCATATATACTTTAGATTGATTTAAAACCTTCATTTTTAATT  
TAAAAGGATCTAGGTGAAGATCCTTTTTGATAATCTCATGACCAAATCCCTAACGTGAGTTTTCGTTC  
CACTGAGCGTCAGACCCCGTAGAAAAGATCAAAGGATCTTCTTGAGATCCTTTTTTCTGCGCGTAATCT  
GCTGCTTGCAAACAAAAAACACCGCTACCAGCGGTGGTTTGTGGCCGATCAAGAGCTACCAACTCT  
TTTTCCGAAGGTAAGTGGCTTACGAGAGCGCAGATACCAAATACTGTTCTTCTAGTGTAGCCGTAGTTA  
GGCCACCACTTCAAGAACTCTGTAGCACCGCTACATACCTCGCTCTGCTAATCCTGTTACCAGTGGCTG  
CTGCCAGTGGCGATAAGTCGTGTCTTACCGGTTGGACTCAAGACGATAGTTACCGGATAAGGCGCAGCG  
GTCGGGTGAACGGGGGTTCTGTGCACACAGCCAGCTTGGAGCGAACGACCTACACCGAACTGAGATAC  
CTACAGCGTGAGCTATGAGAAAGCGCCACGCTTCCGAAGGGAGAAAAGGCGGACAGGTATCCGGTAAGCG  
GCAGGGTCCGAACAGGAGAGCGCACGAGGGAGCTTCCAGGGGGAAAACGCCTGGTATCTTTATAGTCCTGT  
CGGGTTTCGCCACCTCTGACTTGAGCGTCGATTTTTGTGATGCTCGTCAGGGGGGCGGAGCCTATGGAAA  
AACGCCAGCAACGCGGCCTTTTTACGGTTCCTGGCCTTTTGTGCTGACATGTTCTTTCTG  
CGTTATCCCCTGATTCTGTGGATAACCGTATTACCGCCTTGTAGTGAGCTGATACCGCTCGCCGAGCCG  
AACGACCGAGCGCAGCGAGTCACTGAGCGAGGAAGCGGAAGAGCGCCCAATACGCAAACCGCCTCTCCCC  
GCGCGTTGGCCGATTCAATTAATGCAGCTGGCACGACAGTTTCCCGACTGGAAAAGCGGGCAGTGAGCGCA  
ACGCAATTAATGTGAGTTAGTCACTCATTAGGCACCCAGGCTTACACTTTATGCTTCCGGCTCGTAT  
GTTGTGTGGAATTGTGAGCGGATAACAATTTACACAGGAAAACAGCTATGACCATGATTACGCCAAGCGC  
GCAATTAACCTCACTAAAGGGAACAAAAGCTGGAGCTGCAAGCTTAATGTAGTCTTATGCAATACTCTT  
GTAGTCTTGCAACATGGTAACGATGAGTTAGCAACATGCCTTACAAGGAGAGAAAAGCACCGTGCATGC  
CGATTGGTGAAGTAAGGTGGTACGATCGTGCCTTATTAGGAAGGCAACAGACGGGTCTGACATGGATTG  
GACGAACCACTGAATTGCCGATTGCAGAGATATTGATTTAAGTGCCTAGCTCGATACATAAACGGGTC  
TCTCTGGTTAGACCAGATCTGAGCCTGGGAGCTCTCTGGCTAACTAGGGAACCCACTGCTTAAGCCTCAA  
TAAAGCTTGCTTGTGAGTCTTCAAGTAGTGTGTGCCGTCTGTTGTGTGACTCTGGTAACTAGAGATCCC  
TCAGACCCTTTTAGTCAGTGTGGAAAATCTTAGCAGTGGCGCCGAACAGGGACTTGAAAGCGAAAGGG  
AAACCAGAGGAGCTCTCTGACGACGAGACTCGGCTTGTGAAGCGCGCACGGCAAGAGGCGAGGGGCGGC

|                  |                                                                                                                                                                                                                                                                                                                                                                                                                                                                                                                                                                                                                                                                                                                                                                                                                                                                                                                                                                                                                                                                                                                                                                                                                                                                                                                                                                                                                                                                                                                                                                                      |           |  |
|------------------|--------------------------------------------------------------------------------------------------------------------------------------------------------------------------------------------------------------------------------------------------------------------------------------------------------------------------------------------------------------------------------------------------------------------------------------------------------------------------------------------------------------------------------------------------------------------------------------------------------------------------------------------------------------------------------------------------------------------------------------------------------------------------------------------------------------------------------------------------------------------------------------------------------------------------------------------------------------------------------------------------------------------------------------------------------------------------------------------------------------------------------------------------------------------------------------------------------------------------------------------------------------------------------------------------------------------------------------------------------------------------------------------------------------------------------------------------------------------------------------------------------------------------------------------------------------------------------------|-----------|--|
|                  | <p>GACTGGTGAGTACGCCAAAAATTTTGACTAGCGGAGGCTAGAAGGAGAGAGATGGGTGCGAGAGCGTCAG<br/> TATTAAGCGGGGAGAATTAGATCGCGATGGGAAAAAATTCGGTTAAGGCCAGGGGGAAAGAAAAAATAT<br/> AAATTA AACATATAGTATGGGCAAGCAGGGAGCTAGAACGATTTCGAGTTAATCCTGGCCTGTTAGAAA<br/> CATCAGAAGGCTGTAGACAAATACTGGGACAGCTACAACCATCCCTTCAGACAGGATCAGAAGA ACTTAG<br/> ATCATTATATAACAGTAGCAACCTCTATTGTGTGCATCAAAGGATAGAGATAAAAGACACCAAGGAA<br/> GCTTTAGACAAGATAGAGGAAGAGCAAAACAAAAGTAAGACCACCGCACAGCAAGCGGCCGCTGATCTTC<br/> AGACCTGGAGGAGGAGATATGAGGGACAATTGGAGAAGTGAATTATATAAATATAAAGTAGTAAAAATTG<br/> AACCATTAGGAGTAGCACCCACCAAGGCAAAGAGAAGAGTGGTGCAGAGAGAAAAAAGAGCAGTGGGAAT<br/> AGGAGCTTTGTTCTTGGGTTCTTGGGAGCAGCAGGAAGCACTATGGGCGCAGCGTCAATGACGCTGACG<br/> GTACAGGCCAGACAATTATTGTCTGGTATAGTGCAGCAGCAGAACAATTTGCTGAGGGCTATTGAGGCGC<br/> AACAGCATCTGTTGCAACTCACAGTCTGGGGCATCAAGCAGCTCCAGGCAAGAATCCTGGCTGTGGAAG<br/> ATACCTAAAGGATCAACAGCTCCTGGGGATTTGGGGTTGCTCTGGAAA ACTCATTTGCACCACTGCTGTG<br/> CCTTGG AATGCTAGTTGGAGTAATAAATCTCTGGAACAGATTTGGAATCACACGACCTGGATGGAGTGGG<br/> ACAGAGAAATTAACAATTACACAAGCTTAATACACTCCTAATTGAAGAATCGCAAACCAGCAAGAAAA<br/> GAATGAACAAGAATTATTGGAATTAGATAAATGGGCAAGTTTGTGGAATTGGTTAACATAACAAATTGG<br/> CTGTGGTATATAAAATTATTCATAATGATAGTAGGAGGCTTGGTAGGTTTAAGAATAGTTTTTGCTGTAC<br/> TTTCTATAGTGAATAGAGTTAGGCAGGGATATTCACCATTATCGTTTCAGACCCACCTCCAACCCCGAG<br/> GGGACCCGACAGGCCCAAGGAATAGAAGAAGAAGGTGGAGAGAGACAGAGACAGATCCATTTCGATTA<br/> GTGAACGGATCTCGACGGTATCGGTTAACTTTTAAAAGAAAAGGGGGGATTGGGGGTACAGTGCAGGGG<br/> AAAGAATAGTAGACATAATAGCAACAGACATACAACTAAAGAATTACAAAAACAAATTACAAAATTCAA<br/> AATTTTAT</p> |           |  |
| AdCre adenovirus | Viagenbio (#CV10010)                                                                                                                                                                                                                                                                                                                                                                                                                                                                                                                                                                                                                                                                                                                                                                                                                                                                                                                                                                                                                                                                                                                                                                                                                                                                                                                                                                                                                                                                                                                                                                 | Viagenbio |  |

**Cultured Cells**

| Name                               | Vendor or Source | Sex (F, M, or unknown) | Persistent ID / URL |
|------------------------------------|------------------|------------------------|---------------------|
| Mouse embryonic fibroblasts (MEFs) | Lab isolated     | Male & Female          |                     |
|                                    |                  |                        |                     |
|                                    |                  |                        |                     |

**Data & Code Availability**

| Description | Source / Repository | Persistent ID / URL |
|-------------|---------------------|---------------------|
|             |                     |                     |
|             |                     |                     |
|             |                     |                     |

**Other**

| <b>Description</b>                                     | <b>Source /<br/>Repository</b> | <b>Persistent ID / URL</b>                                                                                                                                                                            |
|--------------------------------------------------------|--------------------------------|-------------------------------------------------------------------------------------------------------------------------------------------------------------------------------------------------------|
| SuperScript® III<br>First-Strand<br>Synthesis SuperMix | Thermo Fisher<br>Scientific    | <a href="https://www.thermofisher.com/order/catalog/product/18080400#/18080400">https://www.thermofisher.com/order/catalog/product/18080400#/18080400</a>                                             |
| SsoAdvanced™<br>Universal SYBR®<br>Green Supermix      | Bio-Rad<br>Laboratories        | <a href="http://www.bio-rad.com/en-us/product/ssoadvanced-universal-sybr-green-supermix?ID=MH5H1EE8Z">http://www.bio-rad.com/en-us/product/ssoadvanced-universal-sybr-green-supermix?ID=MH5H1EE8Z</a> |
| Calcium Detection<br>Kit                               | Abcam                          | <a href="https://www.abcam.com/calcium-assay-kit-colorimetric-ab102505.html">https://www.abcam.com/calcium-assay-kit-colorimetric-ab102505.html</a>                                                   |
| Mito Stress Test Kit                                   | Agilent<br>Technologies        | <a href="https://www.agilent.com/store/en_US/Prod-103015-100/103015-100">https://www.agilent.com/store/en_US/Prod-103015-100/103015-100</a>                                                           |
| Dynabeads™<br>protein G                                | Thermo Fisher<br>Scientific    | <a href="https://www.thermofisher.com/order/catalog/product/10009D#/10009D">https://www.thermofisher.com/order/catalog/product/10009D#/10009D</a>                                                     |
